# Supplementary material for: Effect of a Total Extract and Saponins from Astragalus glycyphyllos L. on Human Coronavirus Replication In Vitro
Source: MDPI journal article supplement (doi:10.3390/ijms242216525), 2023-11-20
Supplement: s1 [file s1]

## Supplementary

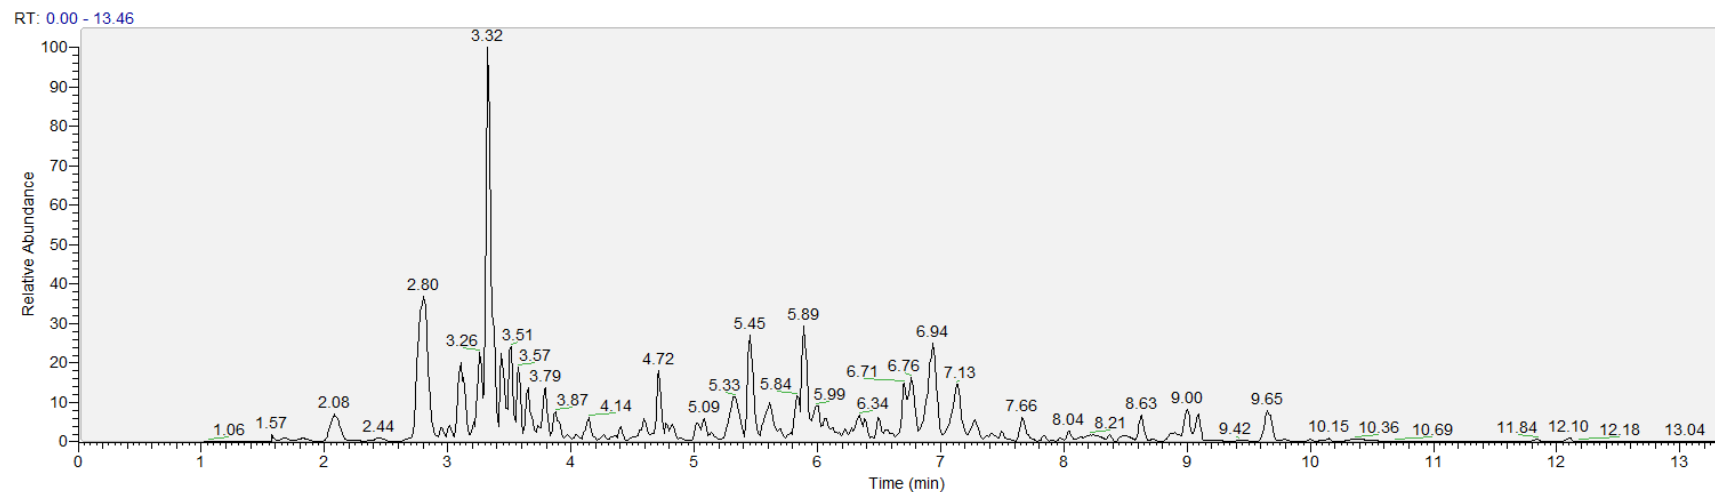

Figure S1. UHPLC-HRESIMS chromatogram (FS) of DEAG in the negative mode.

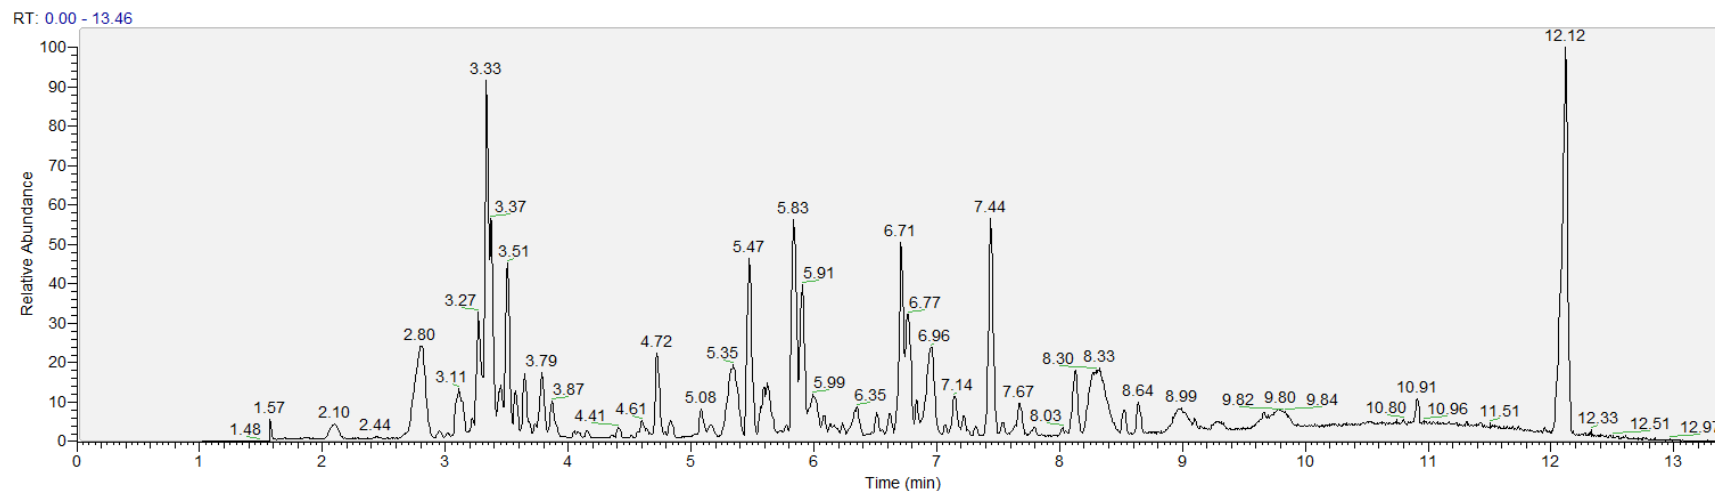

Figure S2. UHPLC-HRESIMS chromatogram (FS) of DEAG in the positive mode.

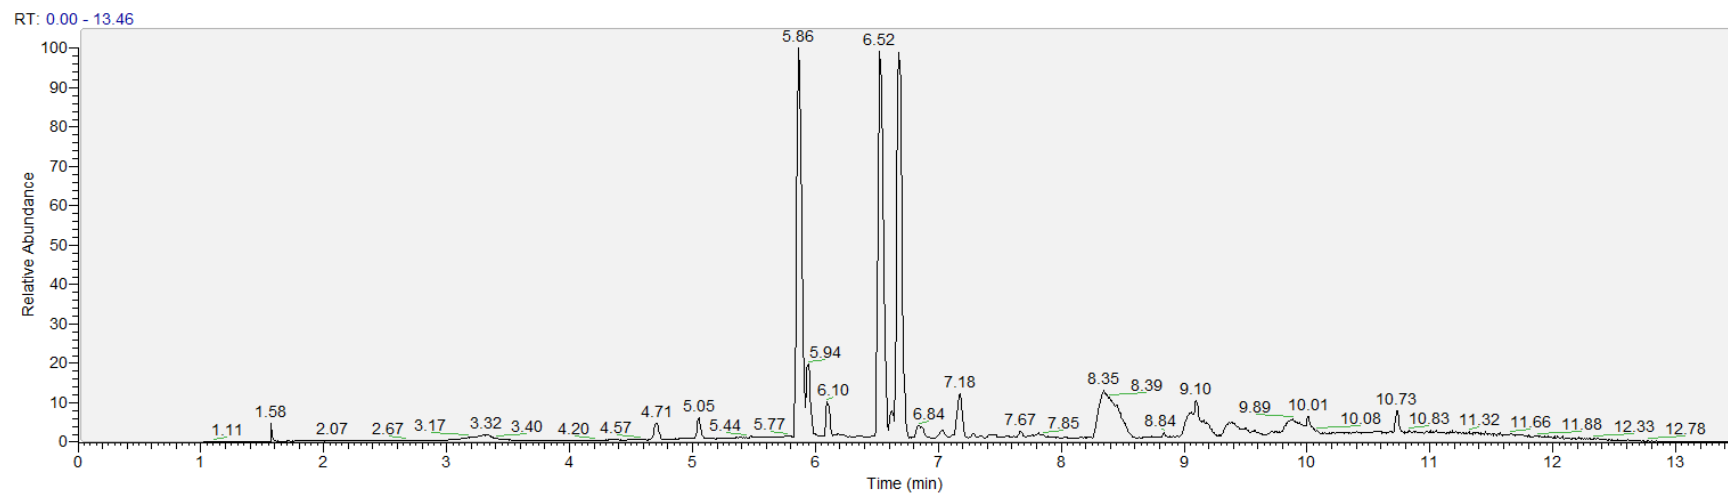

Figure S3. UHPLC-HRESIMS chromatogram (FS) of PSM in the negative mode.

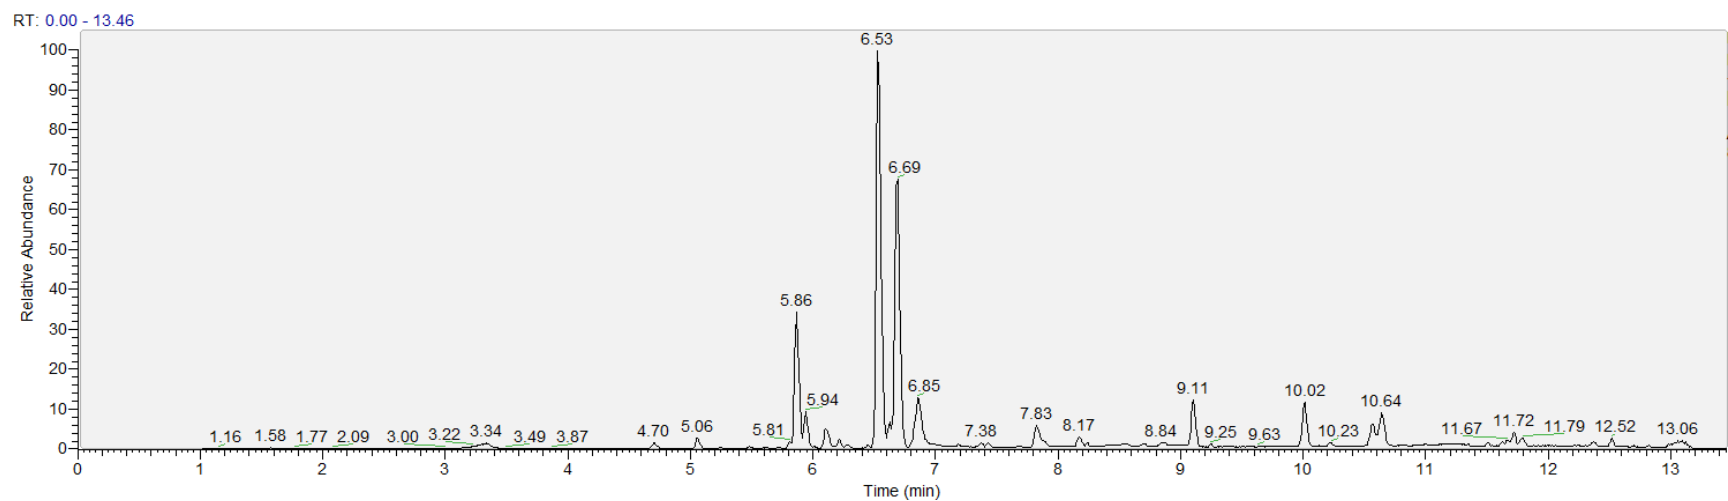

Figure S4. UHPLC-HRESIMS chromatogram (FS) of PSM in the positive mode.

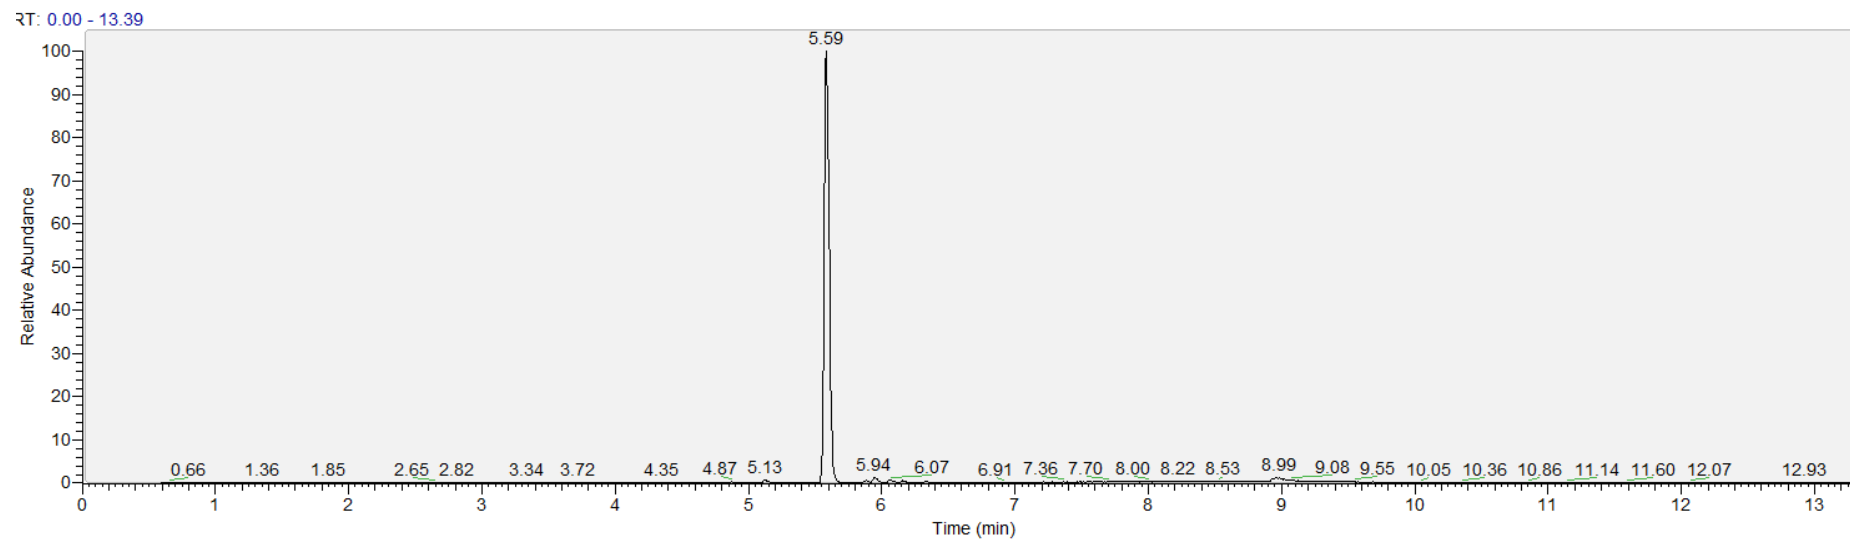

Figure S5. UHPLC-HRESIMS chromatogram ( $m/z$  577.34,  $C_{32}H_{49}O_9$ ) of S1 in the negative mode.

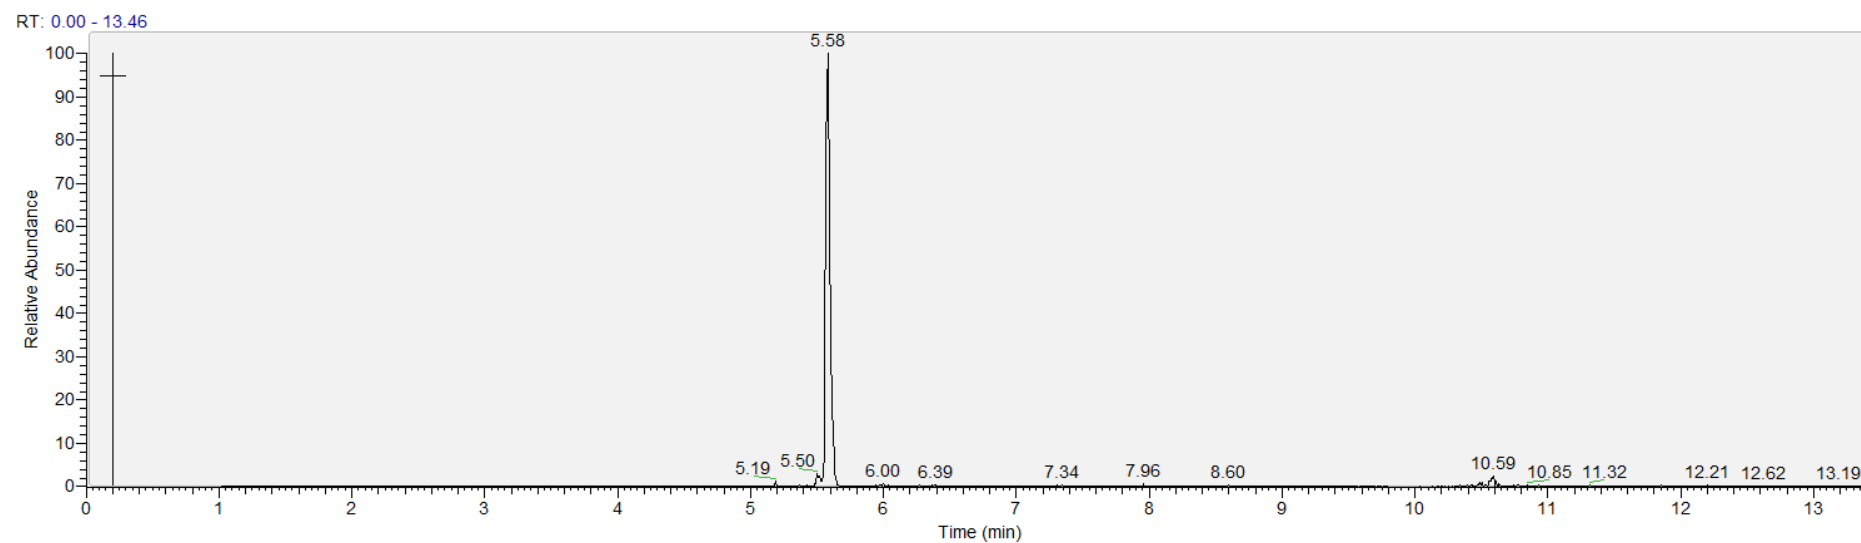

Figure S6. UHPLC-HRESIMS chromatogram ( $m/z$  579.35,  $C_{32}H_{51}O_9$ ) of S1 in the positive mode.

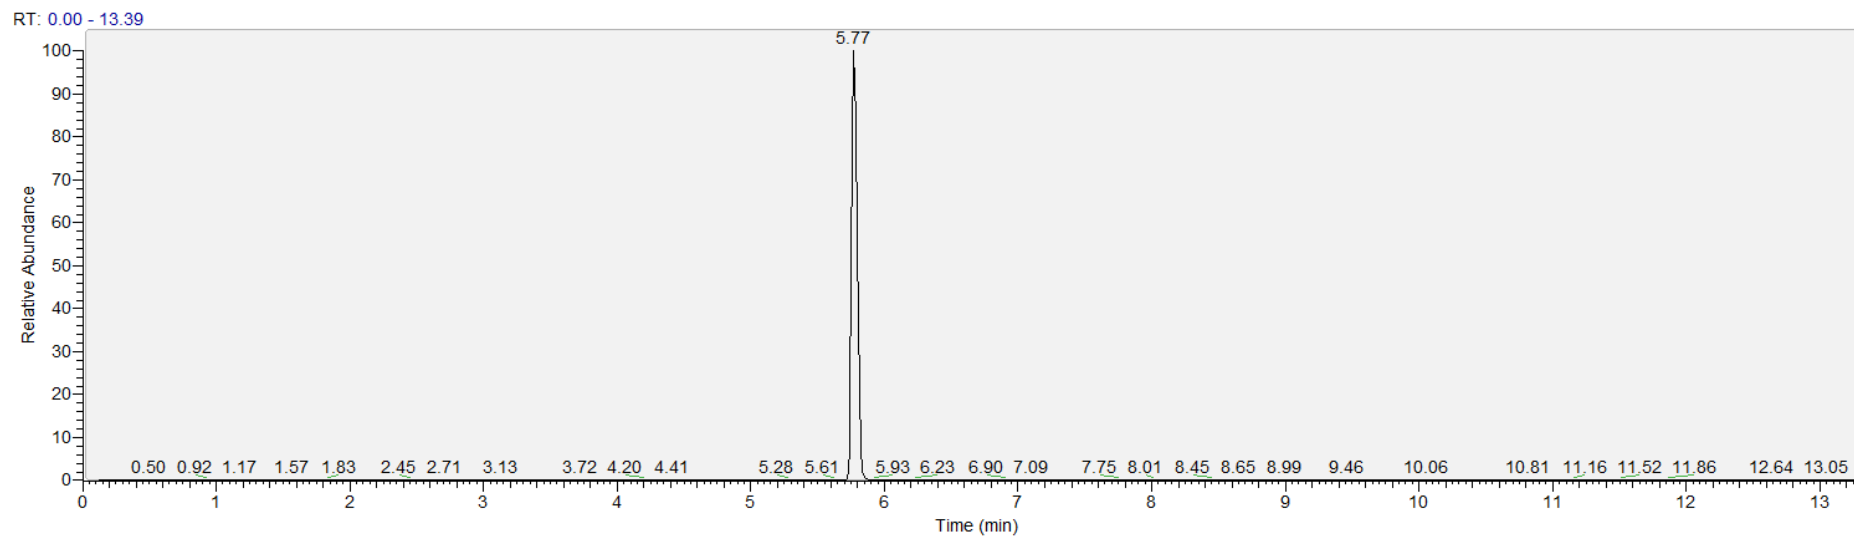

Figure S7. UHPLC-HRESIMS chromatogram ( $m/z$  901.52,  $C_{46}H_{77}O_{17}$ ) of S3 in the negative mode.

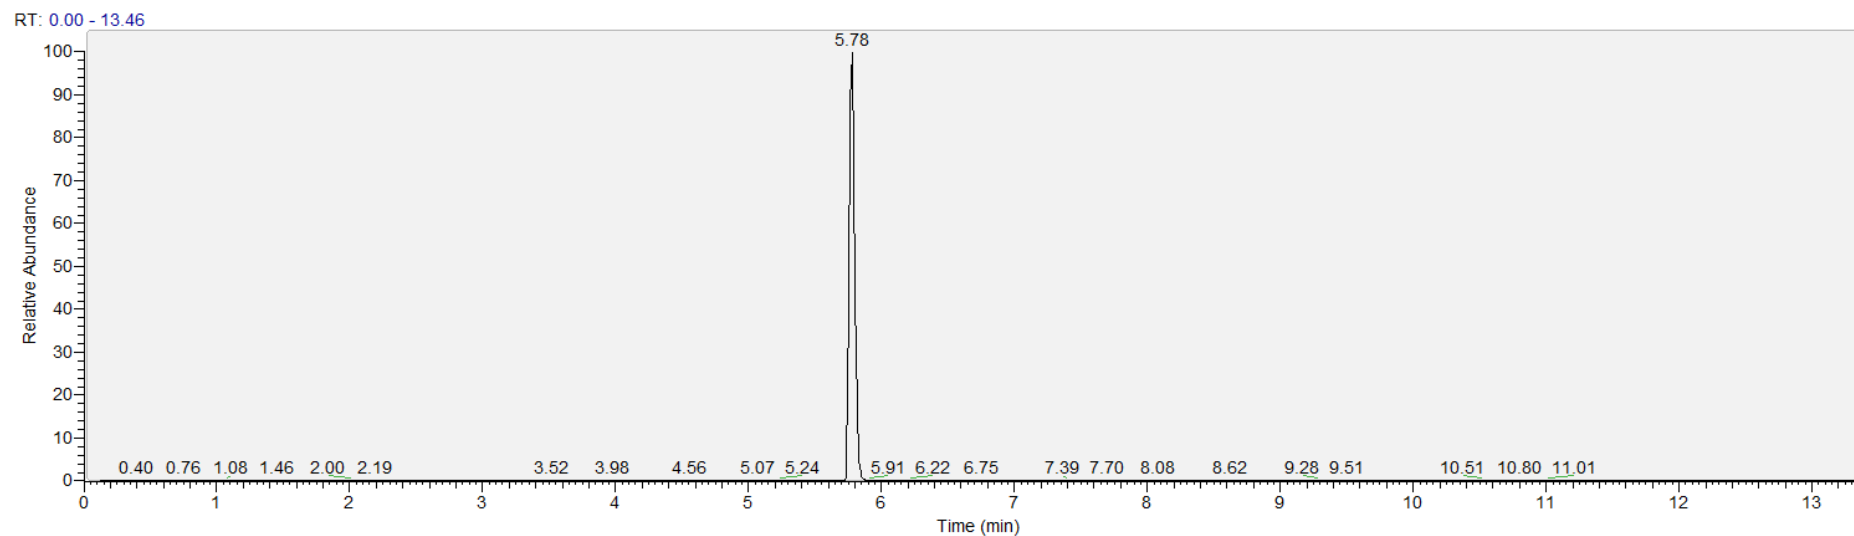

Figure S8. UHPLC-HRESIMS chromatogram ( $m/z$  903.53,  $C_{46}H_{79}O_{17}$ ) of S3 in the positive mode.

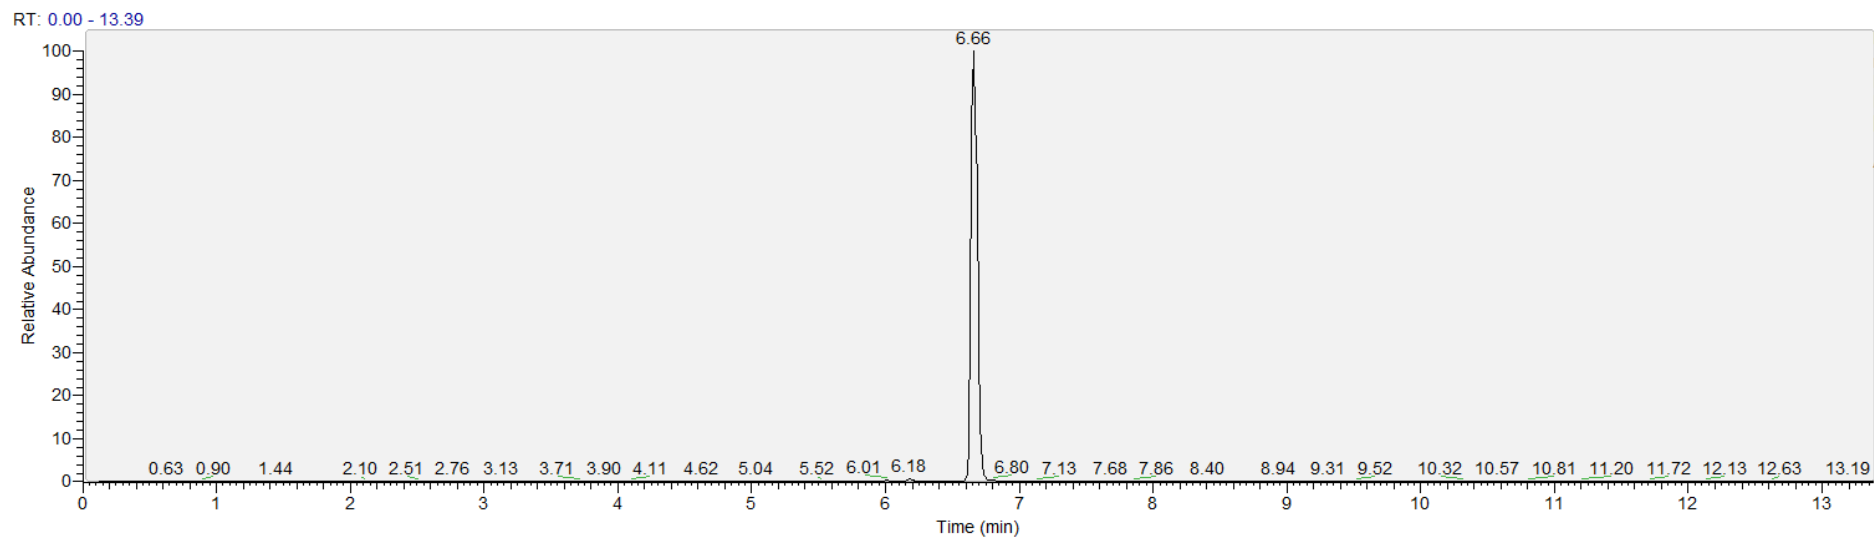

Figure S9. UHPLC-HRESIMS chromatogram ( $m/z$  767.45,  $C_{41}H_{67}O_{13}$ ) of S9 in the negative mode.

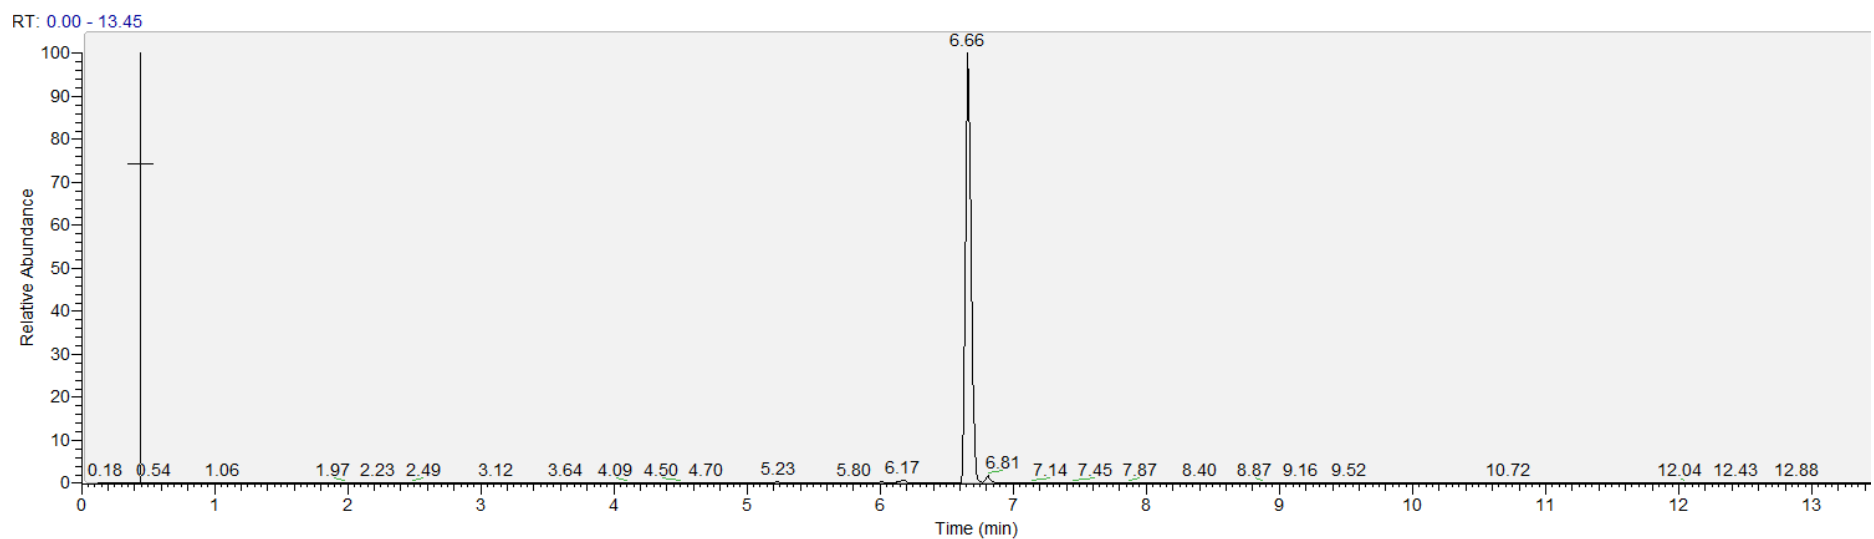

Figure S10. UHPLC-HRESIMS chromatogram ( $m/z$  769.47,  $C_{41}H_{69}O_{13}$ ) of S9 in the positive mode.
